# Supplementary material for: Liquid biopsy monitoring uncovers acquired RAS-mediated resistance to cetuximab in a substantial proportion of patients with head and neck squamous cell carcinoma
Source: PubMed Central journal article supplement (PMC5190002; doi:10.18632/oncotarget.8943), 2016-04-22
Supplement: oncotarget-07-42988-s001.pdf [file oncotarget-07-42988-s001.pdf]

# Liquid biopsy monitoring uncovers acquired RAS-mediated resistance to cetuximab in a substantial proportion of patients with head and neck squamous cell carcinoma

## Supplementary Material

Supplementary Table 1: Illumina-sequencing primers.\*

| PCR     | Primer name        | Primer sequence 5'-3'                                              |
|---------|--------------------|--------------------------------------------------------------------|
| 1st PCR | Seq_Exon 12_I_fw   | ACACTCTTCCCTACACGACGCTCTTCCGATCTacattgttttataattttcaccac           |
|         | Seq_Exon 12_II_fw  | ACACTCTTCCCTACACGACGCTCTTCCGATCTcgctccctcaaggagataag               |
|         | Seq_KRAS_Exon 2_fw | ACACTCTTCCCTACACGACGCTCTTCCGATCTgctctgctgaaaatgactgaa              |
|         | Seq_KRAS_Exon 3_fw | ACACTCTTCCCTACACGACGCTCTTCCGATCTccagactgtttctcccttc                |
|         | Seq_KRAS_Exon 4_fw | ACACTCTTCCCTACACGACGCTCTTCCGATCTggactctgaagatgtacatgg              |
|         | Seq_NRAS_Exon 2_fw | ACACTCTTCCCTACACGACGCTCTTCCGATCTgttctgtggtgtgaaatgac               |
|         | Seq_NRAS_Exon 3_fw | ACACTCTTCCCTACACGACGCTCTTCCGATCTattgaactccctccctccc                |
|         | Seq_NRAS_Exon 4_fw | ACACTCTTCCCTACACGACGCTCTTCCGATCTtcccgtttttagGGAGCAGA               |
|         | Seq_HRAS_Exon 2_fw | ACACTCTTCCCTACACGACGCTCTTCCGATCTggcaggagaccctgtagga                |
|         | Seq_HRAS_Exon 3_fw | ACACTCTTCCCTACACGACGCTCTTCCGATCTctgagccctgtcctcctg                 |
|         | Seq_Exon 12_I_rv   | TGACTGGAGTTCAGACGTGTGCTCTTCCGATCTtggtttctgaccggaggt                |
|         | Seq_Exon 12_II_rv  | TGACTGGAGTTCAGACGTGTGCTCTTCCGATCTgaccattagaaccaactcca              |
|         | Seq_KRAS_Exon 2_rv | TGACTGGAGTTCAGACGTGTGCTCTTCCGATCTagaatggtcctgcaccagtaa             |
|         | Seq_KRAS_Exon 3_rv | TGACTGGAGTTCAGACGTGTGCTCTTCCGATCTtccctcattgcactgtactcc             |
|         | Seq_KRAS_Exon 4_rv | TGACTGGAGTTCAGACGTGTGCTCTTCCGATCTcagtggttactacctgtctgt             |
|         | Seq_NRAS_Exon 2_rv | TGACTGGAGTTCAGACGTGTGCTCTTCCGATCTaagtgttctgattagctgga              |
|         | Seq_NRAS_Exon 3_rv | TGACTGGAGTTCAGACGTGTGCTCTTCCGATCTtggctctcatggcactgt                |
|         | Seq_NRAS_Exon 4_rv | TGACTGGAGTTCAGACGTGTGCTCTTCCGATCTgcaaaactctgcacaaatgc              |
|         | Seq_HRAS_Exon 2_rv | TGACTGGAGTTCAGACGTGTGCTCTTCCGATCTagccctatcctggctgtgt               |
|         | Seq_HRAS_Exon 3_rv | TGACTGGAGTTCAGACGTGTGCTCTTCCGATCTcaaacacacacaggaagccc              |
| 2nd PCR | Linker_Seq_fw      | AATGATACGGCGACCACCGAGATCTACACTCTTCCCTACACGAC                       |
|         | Linker_Bar_Seq_rv  | CAAGCAGAAGACGGCATAACGAGAT(N <sub>6-7</sub> )GTGACTGGAGTTCAGACGTGTG |

\* Capital letters NGS specific sequences; lower case letters gen-specific sequences

Supplementary Table 2: EGFR and RAS reference exon sequences.

| Exon name    | Reference sequences 5'-3'                                                                                                                                                                                                 |
|--------------|---------------------------------------------------------------------------------------------------------------------------------------------------------------------------------------------------------------------------|
| EGFR exon 12 | TGGTCAGTTTTCTCTTGCAGTCGTCAGCCTGAACATAACAT<br>CCTTGGGATTACGCTCCCTCAAGGAGATAAGTGATGGAGA<br>TGTGATAATTTTCAGGAAACAAAAATTTGTGCTATGCAAATAC<br>AATAAACTGGAAAAAACTGTTTGGGACCTCCGGTCAGAAAA<br>CCAAAATTATAAGCAACAGAGGTGAAAACAGCTGCA |
| KRAS exon 2  | GCCTGCTGAAAATGACTGAATATAAACTTGTGGTAGTTGGA<br>GCTGGTGGCGTAGGCAAGAGTGCCTTGACGATACAGCTAA<br>TTCAGAATCATTGTGGACGAATATGATCCAACAATAGAG                                                                                          |
| KRAS exon 3  | GATTCCTACAGGAAGCAAGTAGTAATTGATGGAGAAACCT<br>GTCTCTTGGATATTCTCGACACAGCAGGTCAAGAGGAGTA<br>CAGTGCAATGAGGGACCAGTACATGAGGACTGGGGAGGG<br>CTTTCTTTGTGATTTGCCATAAATAACTAAATCATTGGA<br>AGATATTCACCATTATAG                          |
| KRAS exon 4  | GGACTCTGAAGATGTACCTATGGTCCTAGTAGGAAATAAAT<br>GTGATTTGCCTTCTAGAACAGTAGACACAAAACAGGCTCAG<br>GACTTAGCAAGAAGTTATGGAATTCCTTTTATTGAAACATCA<br>GCAAAGACAAGACAG                                                                   |
| NRAS exon 2  | GTTCTTGCTGGTGTGAAATGACTGAGTACAACTGGTGGT<br>GGTTGGAGCAGGTGGTGTGGGAAAAGCGCACTGACAATC<br>CAGCTAATCCAGAACCACTT                                                                                                                |
| NRAS exon 3  | GATTCTTACAGAAAACAAGTGGTTATAGATGGTGAAACCTG<br>TTTGTGGACATACTGGATACAGCTGGACAAGAAGAGTACA<br>GTGCCATGAGAGACCAA                                                                                                                |
| NRAS exon 4  | GGAGCAGATTAAGCGAGTAAAAGACTCGGATGATGTACCT<br>ATGGTGCTAGTGGGAAACAAGTGTGATTTGCCAACAAGGA<br>CAGTTGATACAAAACAAGCCCACGAACTGGCCAAGAGTTA<br>CGGGATTCCATTGAAACCTCAGCCAAGACCAGACAG                                                  |
| HRAS exon 2  | GGCAGGAGACCCTGTAGGAGGACCCCGGGCCGCAGGCC<br>CCTGAGGAGCGATGACGGAATATAAGCTGGTGGTGGTGG<br>GCGCCGGCGGTGTGGGCAAGAGTGCGCTGACCATCCAGC<br>TGATCCAGAACCATTTTGTGGACGAATACGACCCCACTATA<br>GAG                                          |
| HRAS exon 3  | GATTCCTACCGGAAGCAGGTGGTCATTGATGGGGAGACGT<br>GCCTGTTGGACATCCTGGATACCGCCGGCCAGGAGGAGT<br>ACAGCGCCATGCGGGACCAGTACATGCGCACCGGGGAGG<br>GCTTCCTGTGTGTGTTTG                                                                      |
